# Supplementary material for: Spin-crossover in a trans-[FeL2(NCS)2] family (L = triaryltriazole): remote substituent effects on spin transition modes and temperature
Source: Royal Society of Chemistry journal article supplement (doi:10.1039/c3dt50821h), 2013-01-01
Supplement: c3dt50821h.pdf [file c3dt50821h.pdf]

## Electronic Supplementary Information

### **Spin-crossover in a *trans*-[FeL<sub>2</sub>(NCS)<sub>2</sub>] family (L = triaryltriazole): Remote substituent effects on spin transition modes and temperature**

Guo-Ping Shen,<sup>a</sup> Li Qi,<sup>a</sup> Lei Wang,<sup>a</sup> Yan Xu,<sup>a</sup> Jing-Jing Jiang,<sup>a</sup> Dunru Zhu,<sup>\*a,b</sup> Xiao-Qin Liu<sup>a</sup> and  
Xiaozeng You<sup>b</sup>

<sup>a</sup> State Key Laboratory of Materials-oriented Chemical Engineering, College of Chemistry and Chemical Engineering, Nanjing University of Technology, Nanjing 210009, China.

<sup>b</sup> State Key Laboratory of Coordination Chemistry, Nanjing National Laboratory of Microstructures, School of Chemistry and Chemical Engineering, Nanjing University, Nanjing 210093, China.

\*Corresponding author. E-mail: [zhudr@njut.edu.cn](mailto:zhudr@njut.edu.cn); Fax: +86 25 83172261; Tel: +86 25 83587717

**Table S1** Dihedral angles (°) between the aryl ring and triazole ring of triaryltriazoles in **1-4**.

| Complexes                    | Py/Trz          | <i>p</i> -Cl-Ph/Trz | <i>p</i> -CH <sub>3</sub> -Ph/Trz | <i>p</i> -CH <sub>3</sub> O-Ph/Trz | <i>p</i> -F-Ph/Trz |
|------------------------------|-----------------|---------------------|-----------------------------------|------------------------------------|--------------------|
| <b>1</b>                     | 13.4(3)/14.3(3) | 85.8(3)             |                                   |                                    |                    |
| <b>2</b>                     | 11.6(3)/14.8(3) |                     | 82.9(3)                           |                                    |                    |
| <b>3</b> 0.5H <sub>2</sub> O | 9.9(3)          |                     | 75.5(3)                           | 36.3(3)                            |                    |
| <b>4</b>                     | 9.3(3)          |                     | 80.4(3)                           |                                    | 36.9(3)            |

**Table S2** Hydrogen-bond geometry and  $\pi$ -stacking interaction (Å, °) for **1** and **2**.

| Complexes | D–H $\cdots$ A                                                              | d(D–H) | d(H $\cdots$ A)       | d(D $\cdots$ A)           | $\angle$ D–H $\cdots$ A |
|-----------|-----------------------------------------------------------------------------|--------|-----------------------|---------------------------|-------------------------|
| <b>1</b>  | C9–H9 $\cdots$ C11 <sup><i>i</i></sup>                                      | 0.93   | 2.780(1)              | 3.528(4)                  | 138                     |
|           | C2–H2 $\cdots$ C17 <sup><i>ii</i></sup>                                     | 0.93   | 2.744(1)              | 3.627(4)                  | 159                     |
|           | C14–H14 $\cdots$ N3 <sup><i>iii</i></sup>                                   | 0.93   | 2.506(2)              | 3.403(4)                  | 162                     |
|           | C4–H4 $\cdots$ $\pi$ (C13-18)                                               | 0.93   | 2.899(1)              | 3.707(4)                  | 146                     |
|           | C19 $\cdots$ C12 <sup><i>iii</i></sup>                                      |        |                       | 3.309(3)                  |                         |
|           | $\pi$ – $\pi$ interaction                                                   |        | d(cent $\cdots$ cent) | d( $\pi$ $\cdots$ $\pi$ ) | dihedral angle          |
|           | $\pi$ (N4) $\cdots$ $\pi$ <sup><i>iii</i></sup> (N4 <sup><i>iii</i></sup> ) |        | 3.816                 | 3.685                     | 0.0                     |
|           | $\pi$ (N5) $\cdots$ $\pi$ <sup><i>iv</i></sup> (N5 <sup><i>iv</i></sup> )   |        | 3.790                 | 3.547                     | 0.0                     |
| <b>2</b>  | C9–H9 $\cdots$ C19 <sup><i>i</i></sup>                                      | 0.93   | 2.889(1)              | 3.631(4)                  | 138                     |
|           | C2–H2 $\cdots$ C15 <sup><i>v</i></sup>                                      | 0.93   | 2.732(1)              | 3.621(4)                  | 160                     |
|           | C18–H18 $\cdots$ N3 <sup><i>vi</i></sup>                                    | 0.93   | 2.523(2)              | 3.433(4)                  | 167                     |
|           | C4–H4 $\cdots$ $\pi$ (C13-18)                                               | 0.93   | 2.887(1)              | 3.708(4)                  | 148                     |
|           | C20 $\cdots$ C12 <sup><i>vi</i></sup>                                       |        |                       | 3.357(3)                  |                         |
|           | $\pi$ – $\pi$ interaction                                                   |        | d(cent $\cdots$ cent) | d( $\pi$ $\cdots$ $\pi$ ) | dihedral angle          |
|           | $\pi$ (N4) $\cdots$ $\pi$ <sup><i>vi</i></sup> (N4 <sup><i>vi</i></sup> )   |        | 4.001                 | 3.841                     | 0.0                     |
|           | $\pi$ (N5) $\cdots$ $\pi$ <sup><i>vii</i></sup> (N5 <sup><i>vii</i></sup> ) |        | 3.885                 | 3.593                     | 0.0                     |

Symmetry codes: (*i*) *x*, *y*, *z*-1; (*ii*) -*x*, 1-*y*, 2-*z*; (*iii*) 1-*x*, 1-*y*, 1-*z*; (*iv*) 1-*x*, -*y*, 1-*z*;

(*v*) -*x*, -*y*, 1-*z*; (*vi*) 1-*x*, -*y*, -*z*; (*vii*) 1-*x*, -1-*y*, -*z*.

**Table S3** Hydrogen-bond geometry and  $\pi$ -stacking interaction (Å, °) for **3** 0.5H<sub>2</sub>O and **4**.

| Complexes                    | D–H $\cdots$ A                                                      | d(D–H) | d(H $\cdots$ A) | d(D $\cdots$ A) | $\angle$ D–H $\cdots$ A |
|------------------------------|---------------------------------------------------------------------|--------|-----------------|-----------------|-------------------------|
| <b>3</b> 0.5H <sub>2</sub> O | C16–H16 $\cdots$ O1W                                                | 0.93   | 2.550           | 3.136(4)        | 121                     |
|                              | C20 <sup><i>viii</i></sup> –H20A <sup><i>viii</i></sup> $\cdots$ O1 | 0.93   | 2.530           | 3.169(6)        | 126                     |
|                              | C14A–H14E $\cdots$ S1 <sup><i>ix</i></sup>                          | 0.96   | 2.826           | 3.470(4)        | 125                     |
|                              | C16–H16 $\cdots$ $\pi$ <sup><i>iv</i></sup> (Py)                    | 0.93   | 3.045           | 3.883(3)        | 151                     |
|                              | C4–H4 $\cdots$ $\pi$ (C15-20)                                       | 0.93   | 2.890           | 3.728(4)        | 151                     |
| <b>4</b>                     | C15–H15 $\cdots$ F1 <sup><i>x</i></sup>                             | 0.93   | 2.490           | 3.329(3)        | 150                     |
|                              | C3–H3B $\cdots$ S1 <sup><i>xi</i></sup>                             | 0.93   | 2.938           | 3.656(3)        | 135                     |
|                              | C19–H19 $\cdots$ $\pi$ <sup><i>xi</i></sup> (Py)                    | 0.93   | 2.976           | 3.788(3)        | 147                     |
|                              | C4–H4 $\cdots$ $\pi$ (C14-19)                                       | 0.93   | 2.903           | 3.746(3)        | 151                     |

Symmetry codes: (*viii*) *x*, -1/2-*y*, 1/2+*z*; (*ix*) *x*-1, -1/2-*y*, *z*-1/2; (*x*) *x*, 1/2-*y*, *z*-1/2;

(*xi*) 2-*x*, -*y*, -*z*.

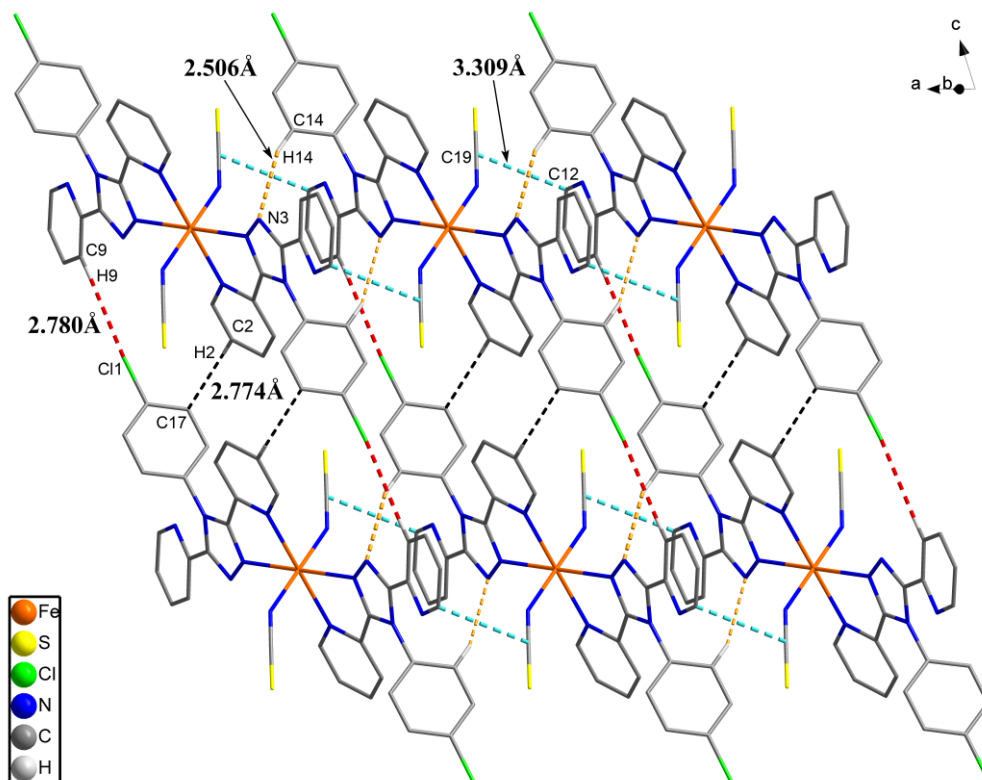

**Figure S1.** View of the hydrogen bonds and C...C contacts in **1**.

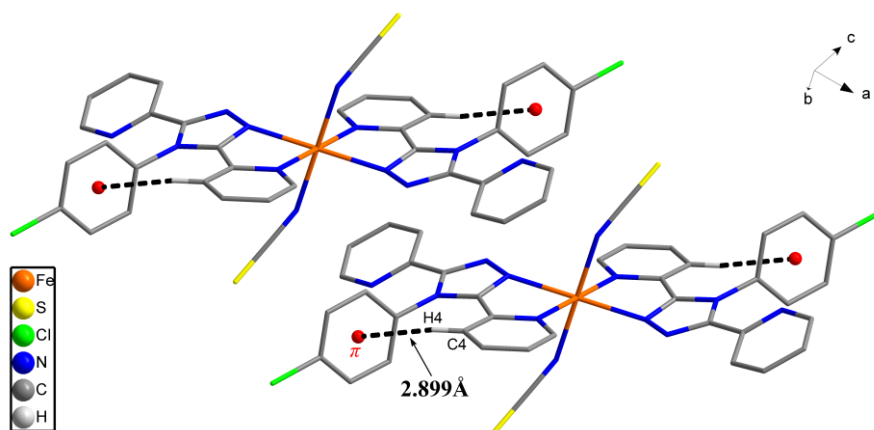

**Figure S2.** View of the intramolecular edge-to-face C4-H4... $\pi$  interaction in **1**.

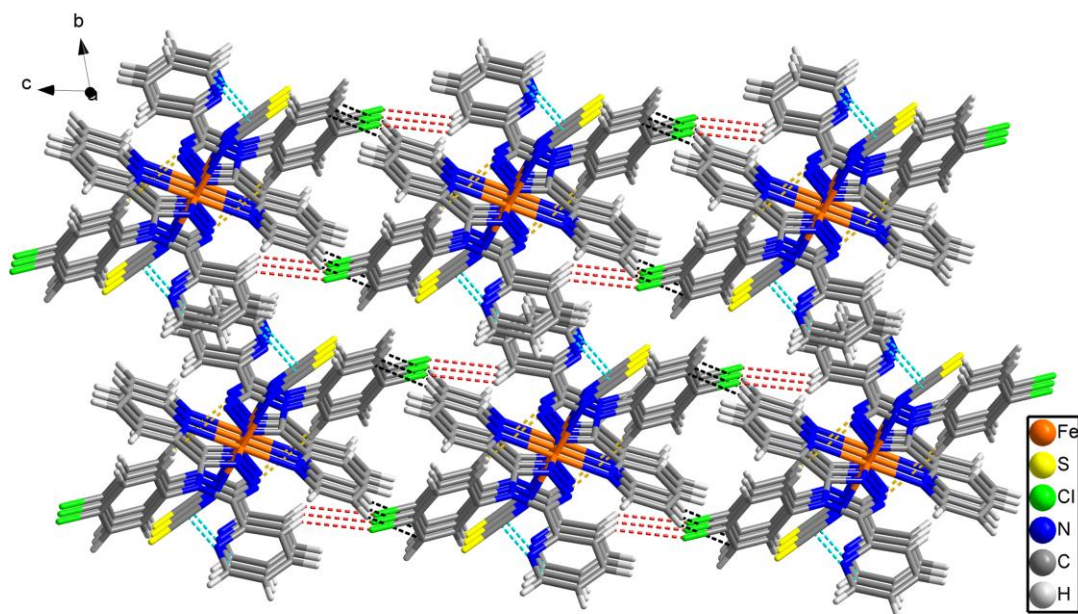

**Figure S3.** 3D structure of **1**.

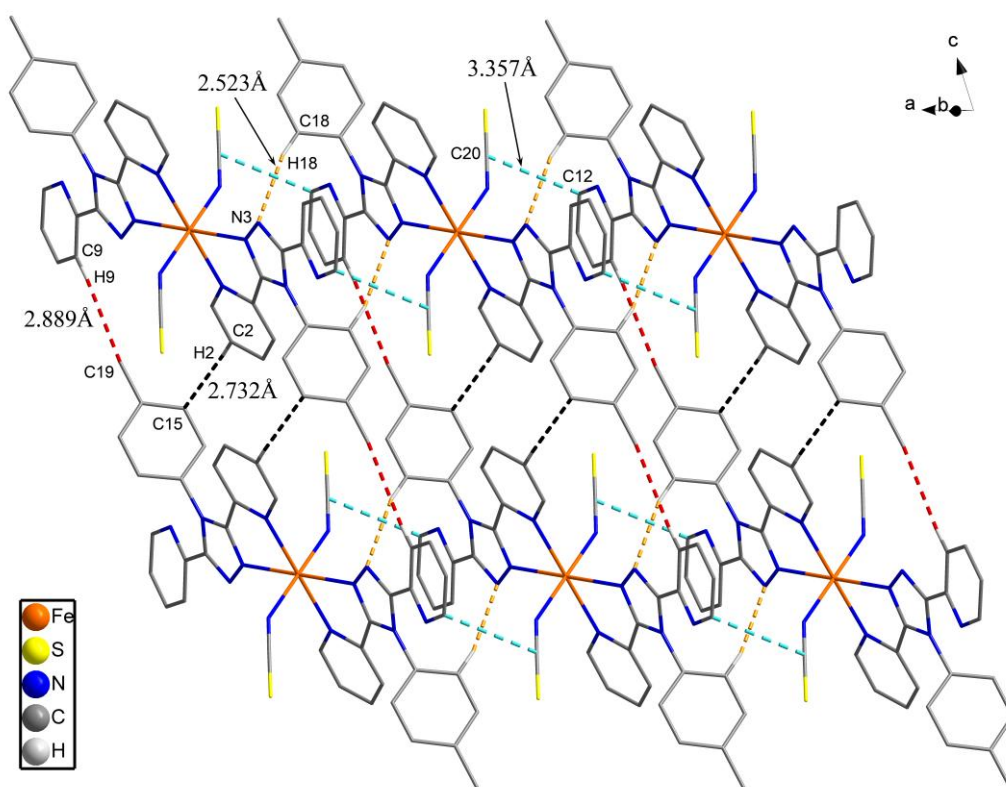

**Figure S4.** View of the hydrogen bonds and C ··· C contacts in **2**.

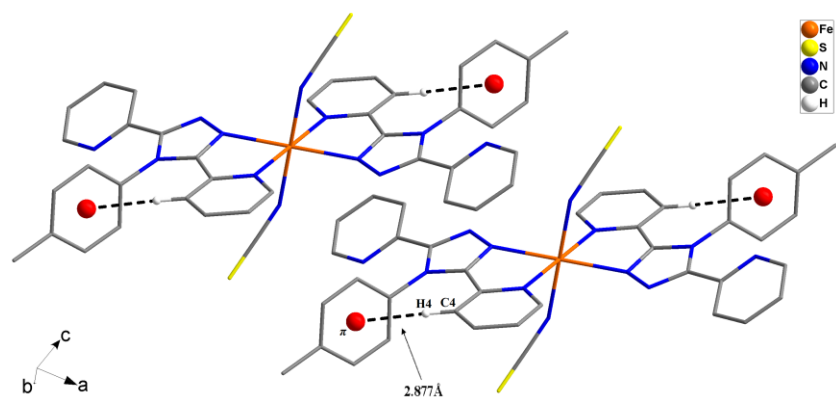

**Figure S5.** View of the intramolecular edge-to-face C4-H4 ··· $\pi$  interaction in **2**.

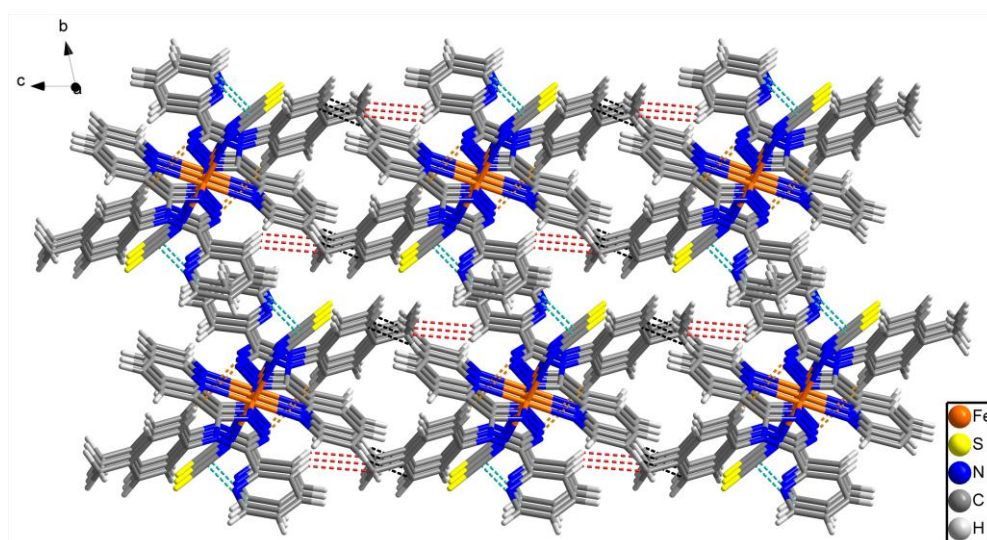

**Figure S6.** 3D structure of **2**.

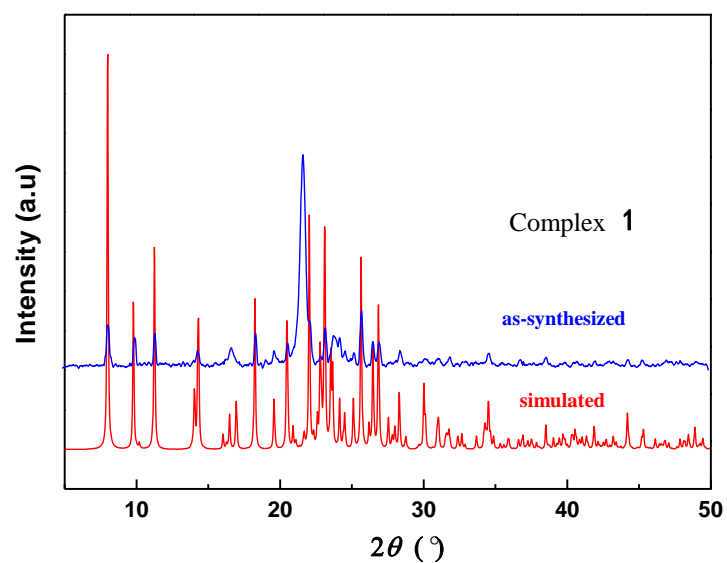

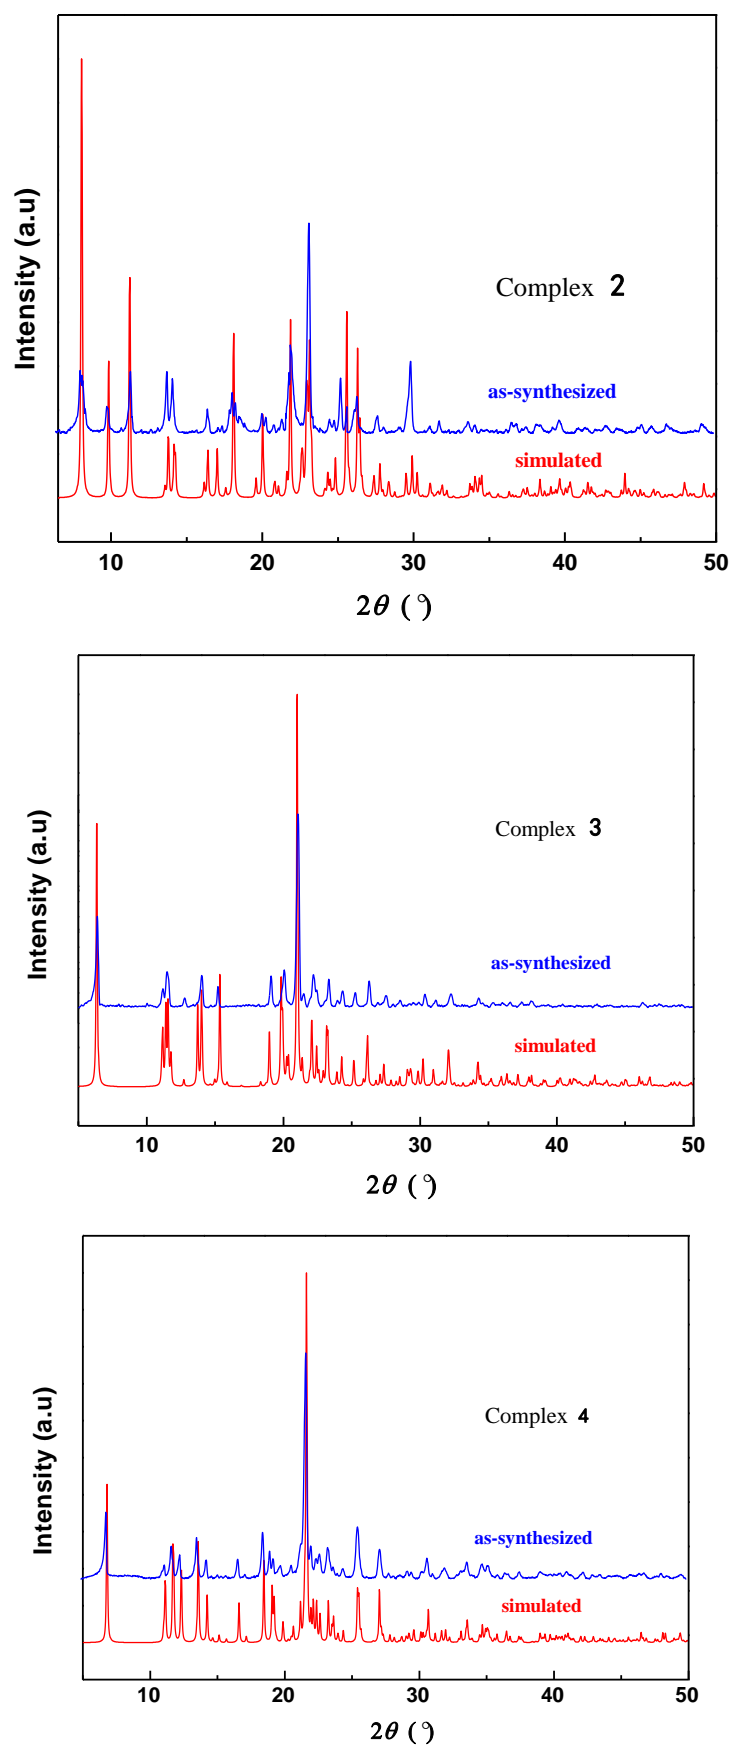

**Fig. S7** Experimental and simulated powder XRD patterns of complexes 1-4.
